# Supplementary material for: Further Mulinane and Azorellane Diterpenoids Isolated from Mulinum crassifolium and Azorella compacta
Source: PubMed Central journal article supplement (PMC6271538; doi:10.3390/molecules19043898), 2014-03-28

# Supplementary File

Figure S1. Proton NMR spectra (500.13 MHz) of compound 1.

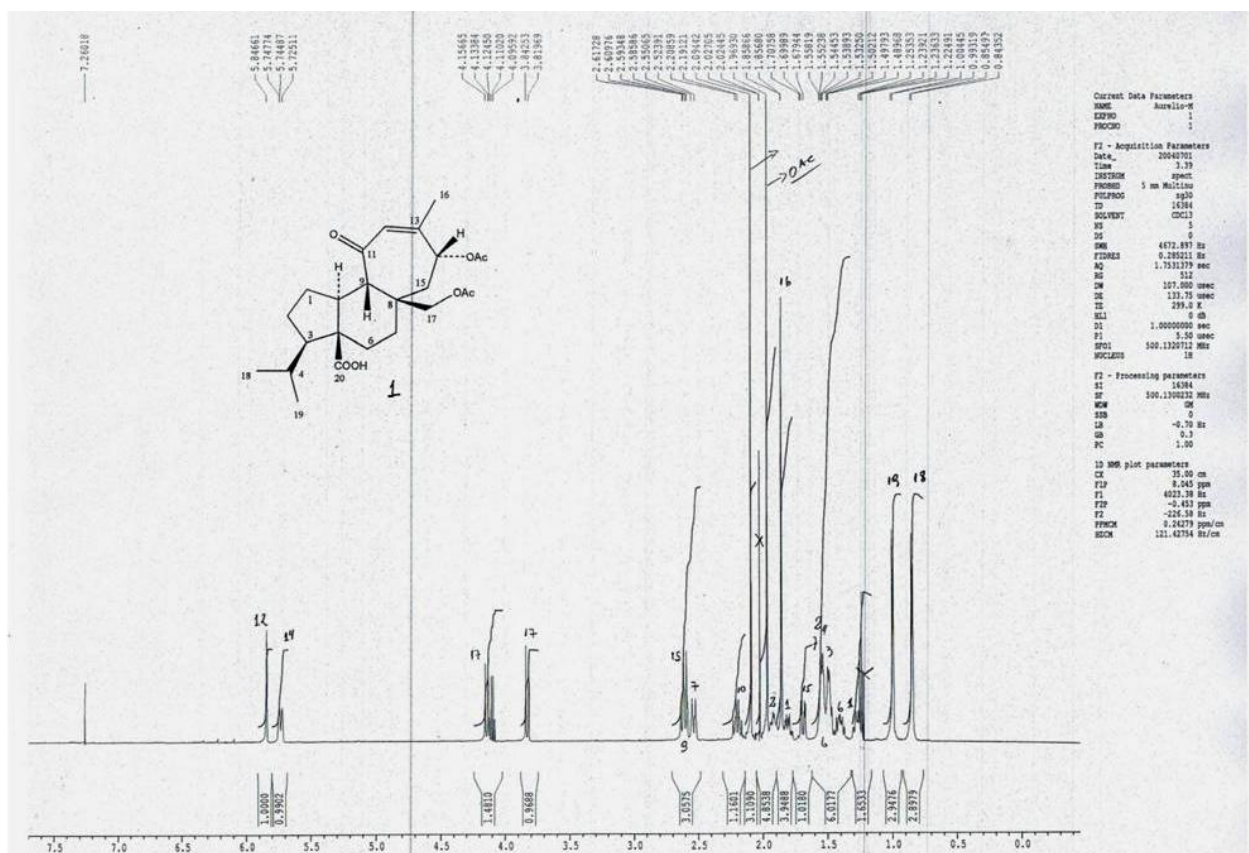

Figure S2. Partial zoom of the proton NMR spectra (500.13 MHz) of compound 1.

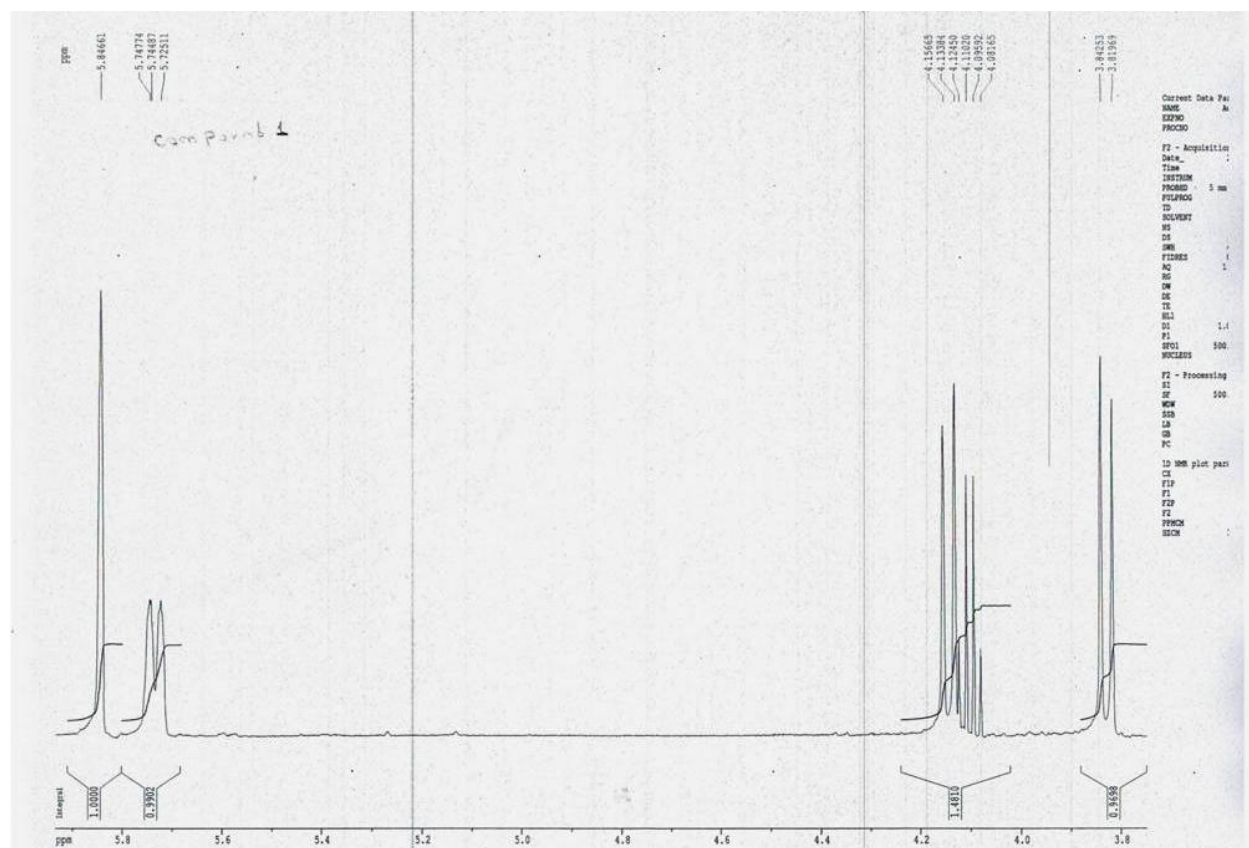

Figure S3. Partial zoom of the proton NMR spectra (500.13 MHz) of compound 1 (Cont.).

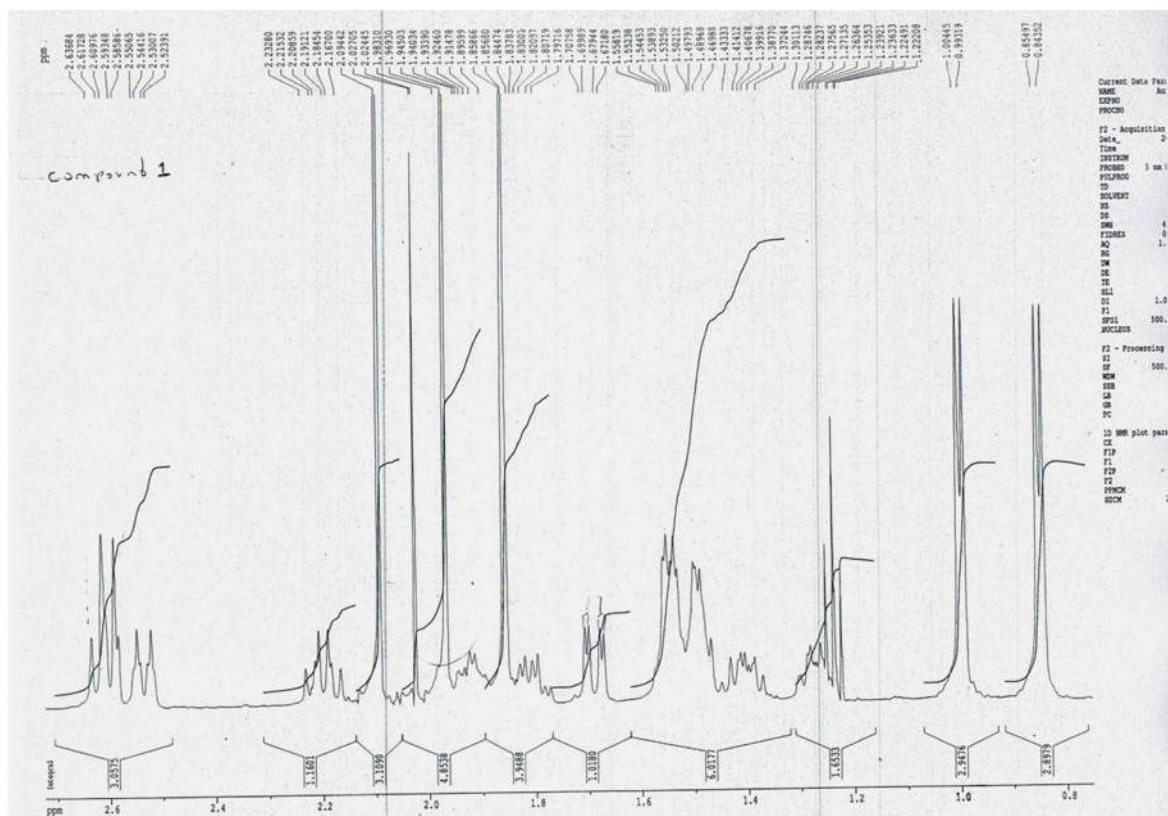

Figure S4. Carbon NMR spectra (125.76 MHz) of compound 1.

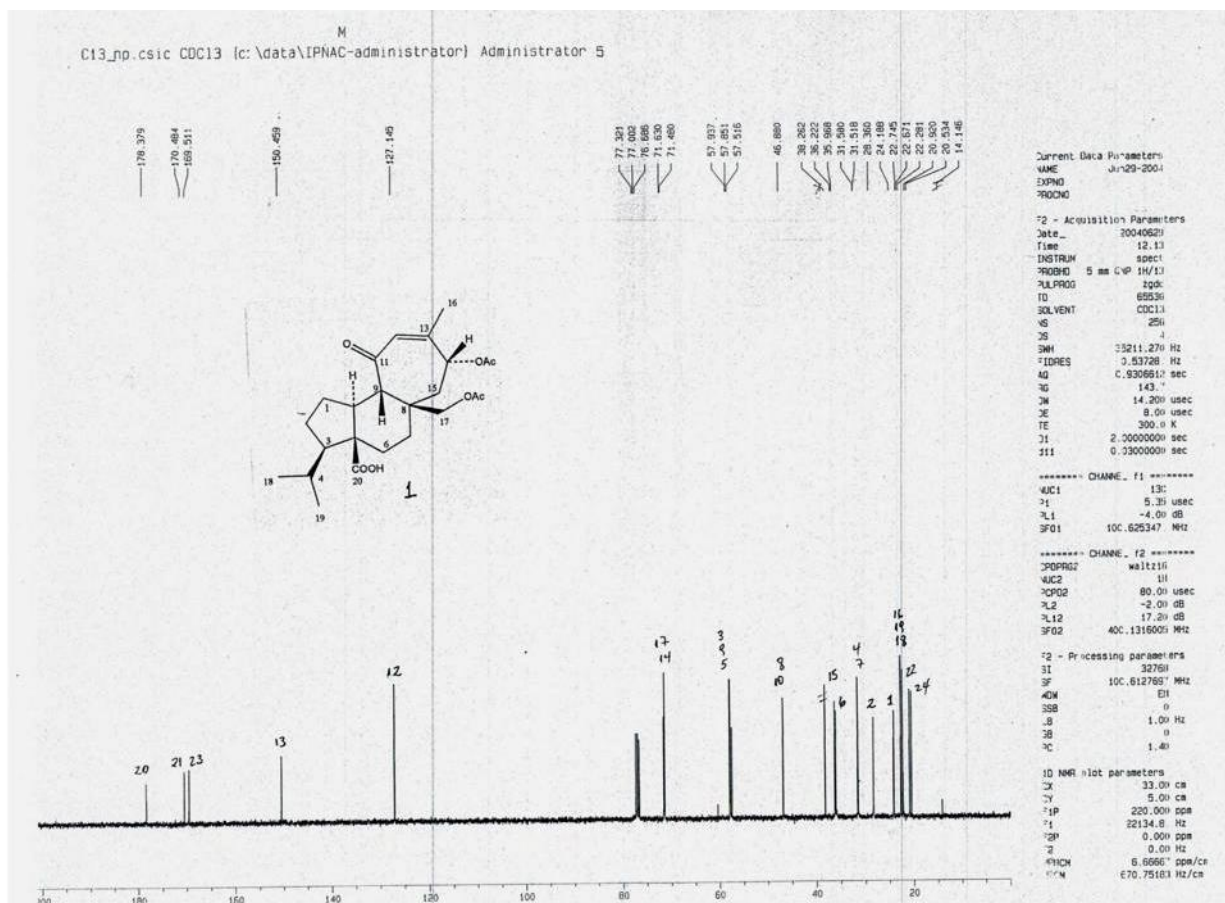

Figure S5.  $^1\text{H}$ - $^1\text{H}$  COSY NMR spectra of compound 1.

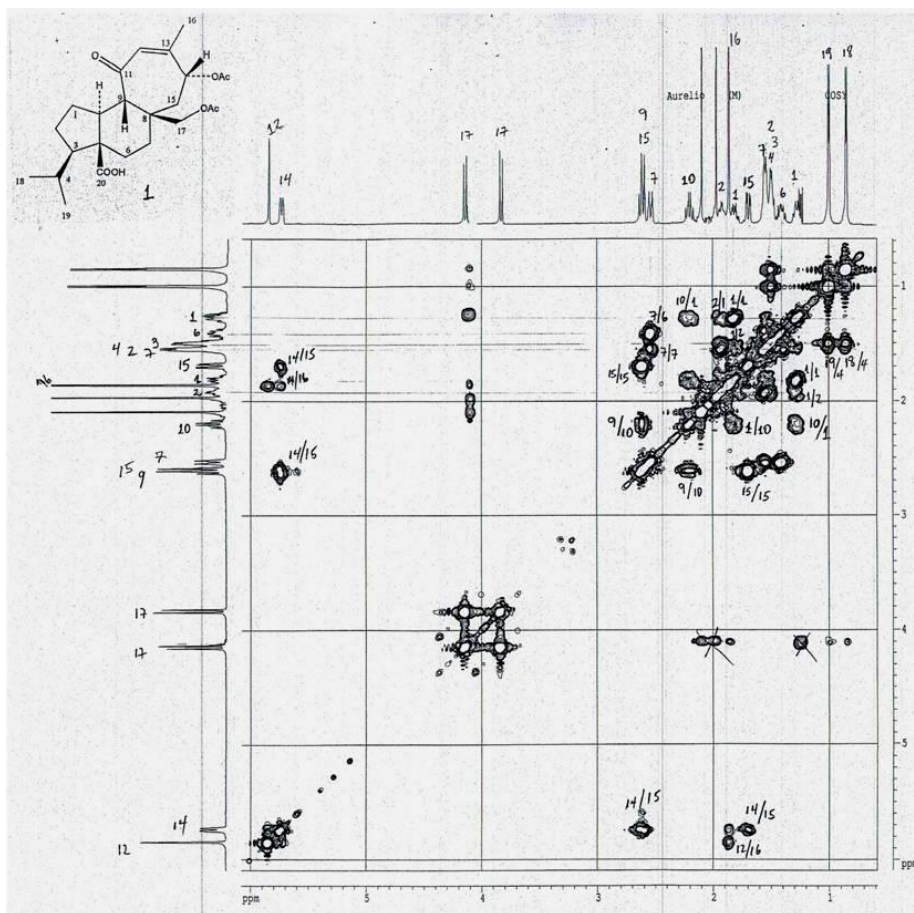

Figure S6. HMBC spectra of compound 1.

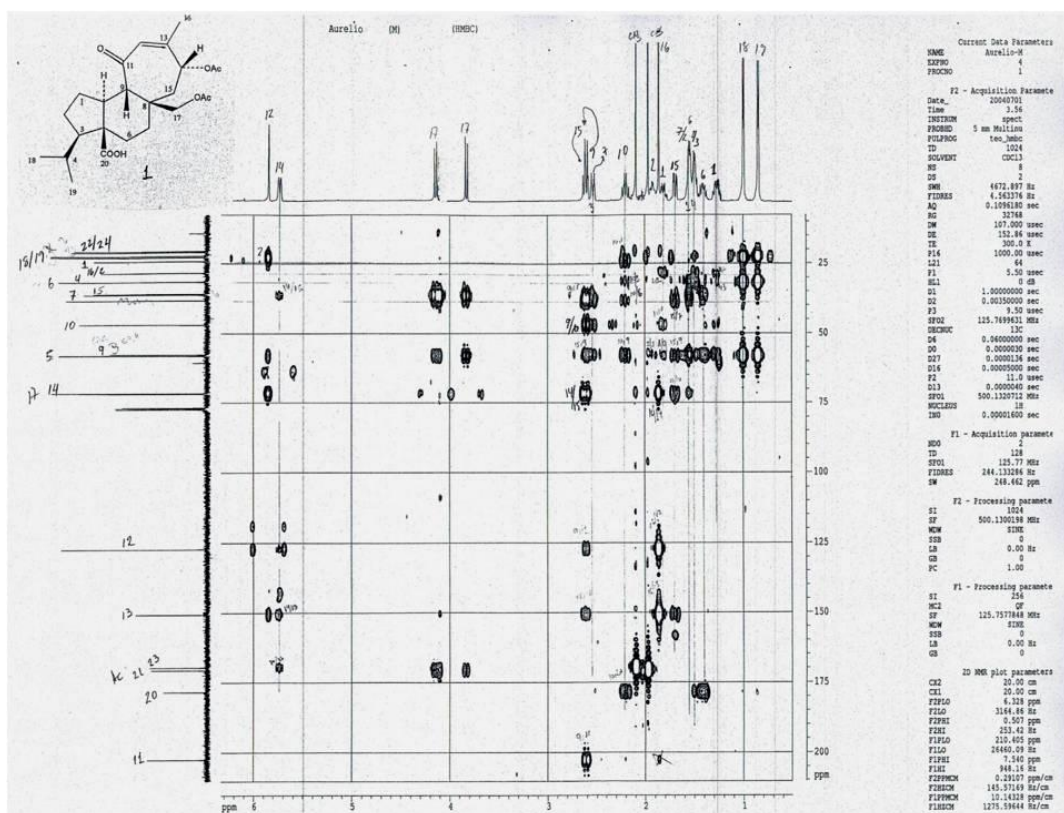

Figure S7. NOESY spectra of compound 1.

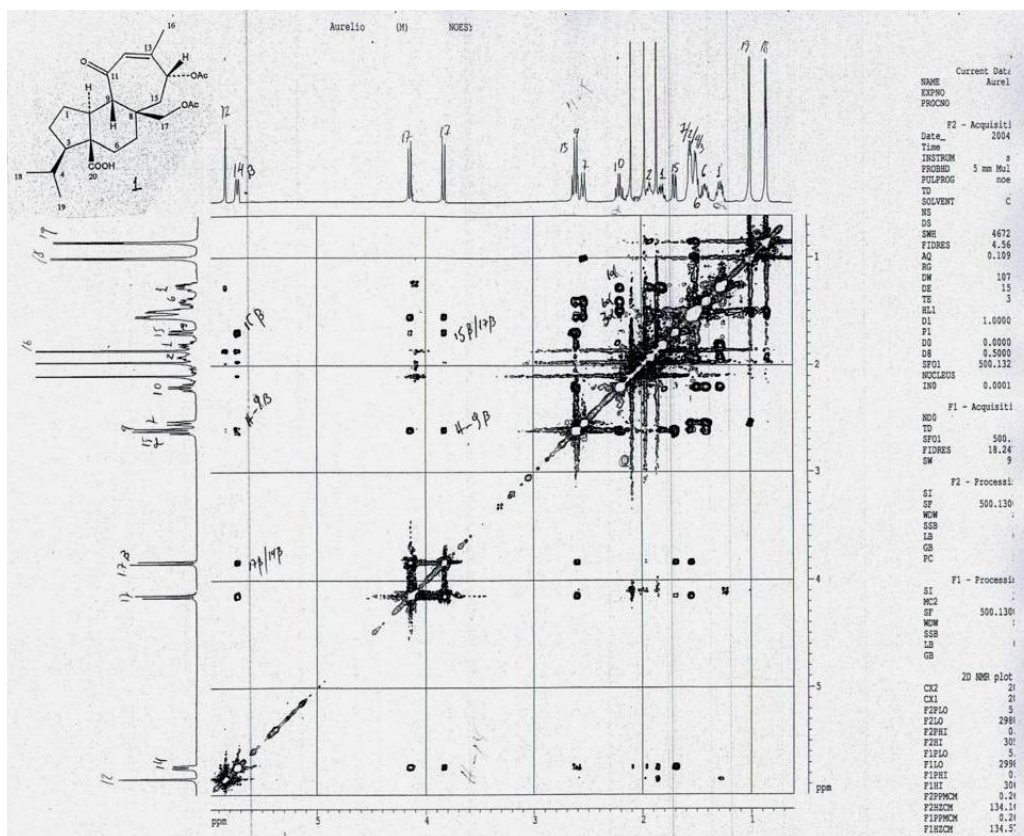

Figure S8. HSQC spectra of compound 1.

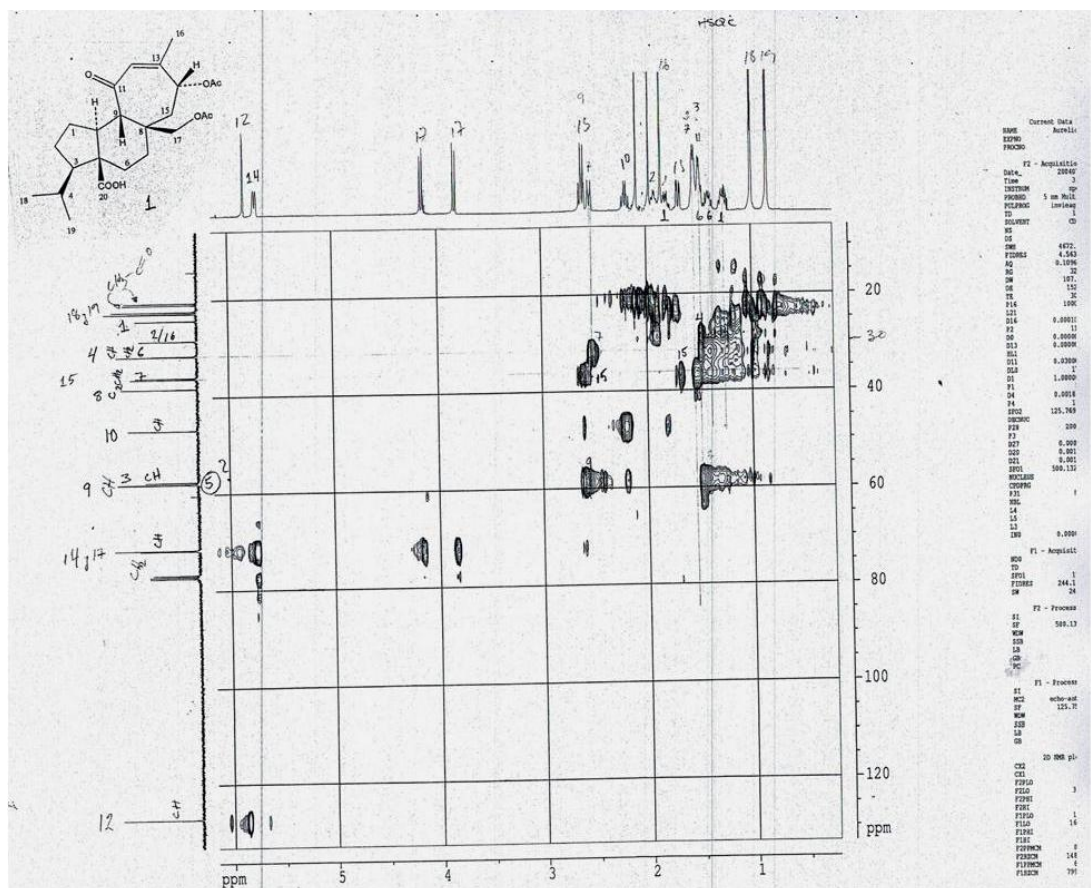

Figure S9. Proton NMR spectra (500.13 MHz) of compound 2.

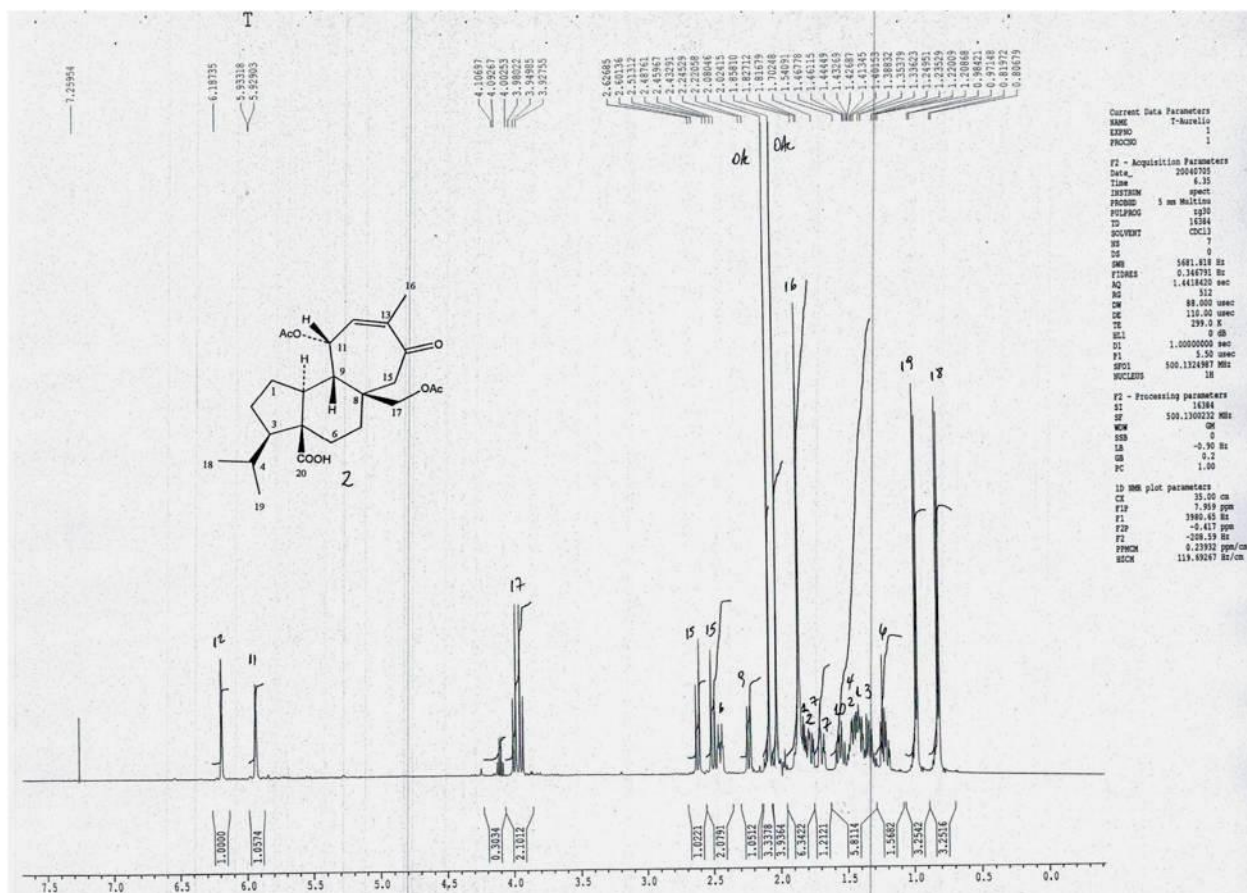

Figure S10. Partial zoom of the proton NMR spectra (500.13 MHz) of compound 2.

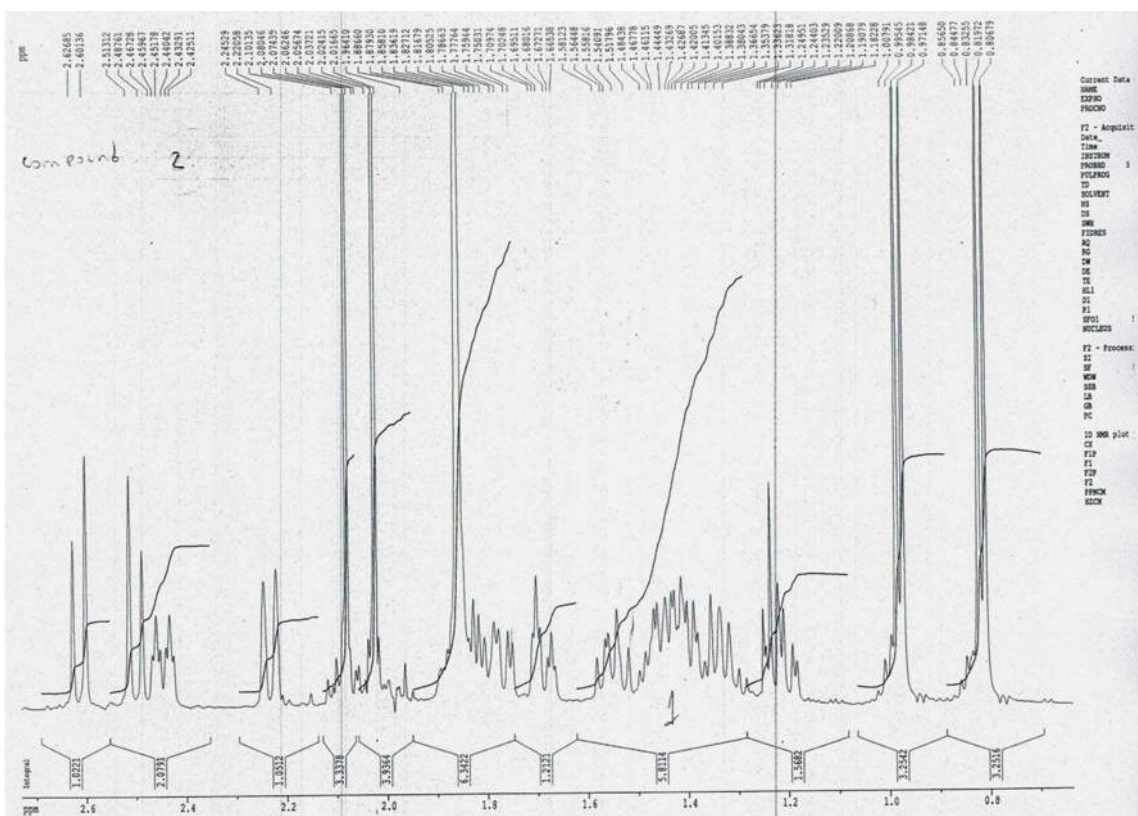

**Figure S11.** Partial zoom of the proton NMR spectra (500.13 MHz) of compound **2** (Cont).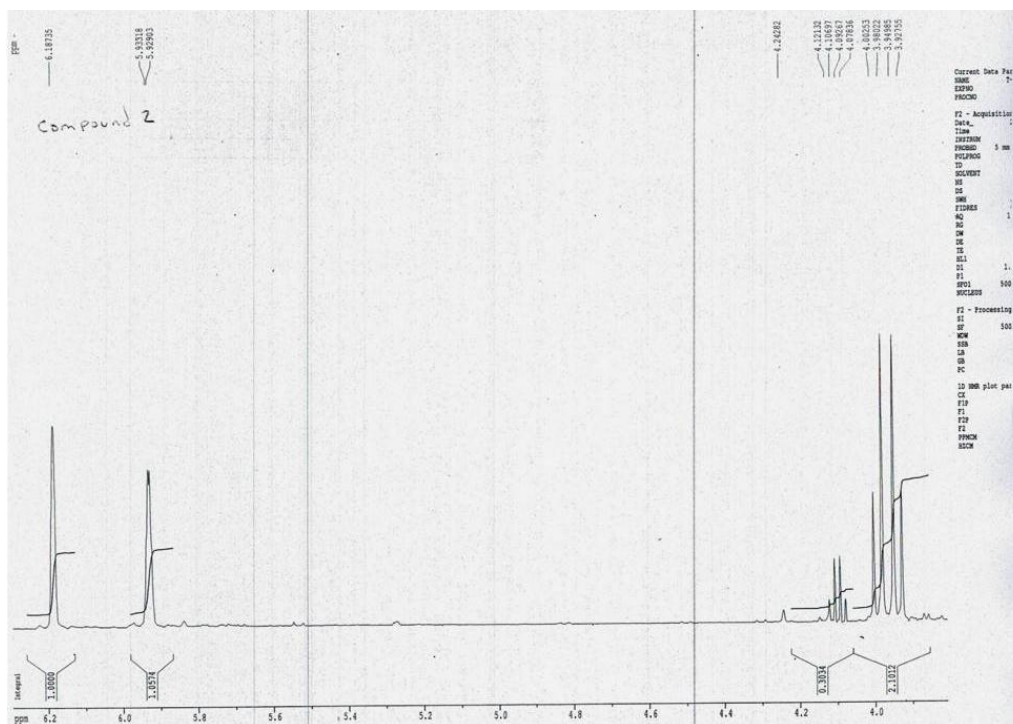**Figure S12.**  $^1\text{H}$ - $^1\text{H}$  COSY spectra of compound **2**.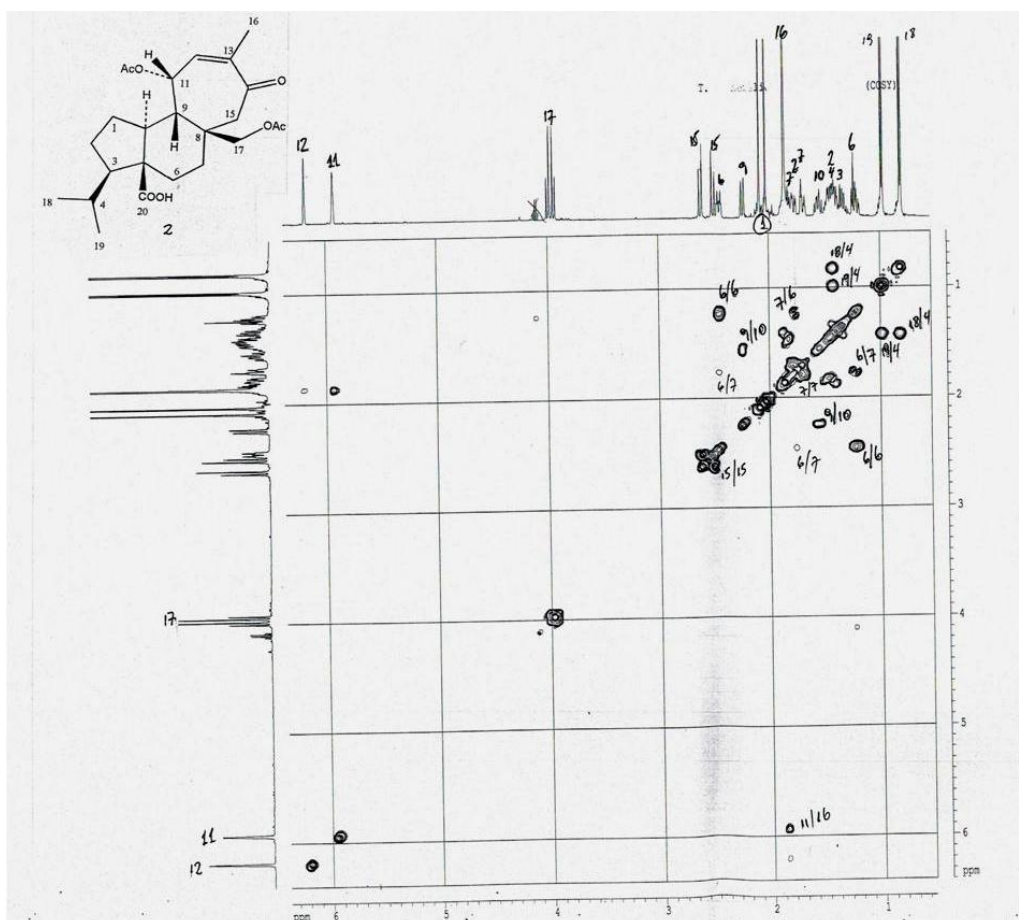

Figure S13. NOESY spectra of compound 2.

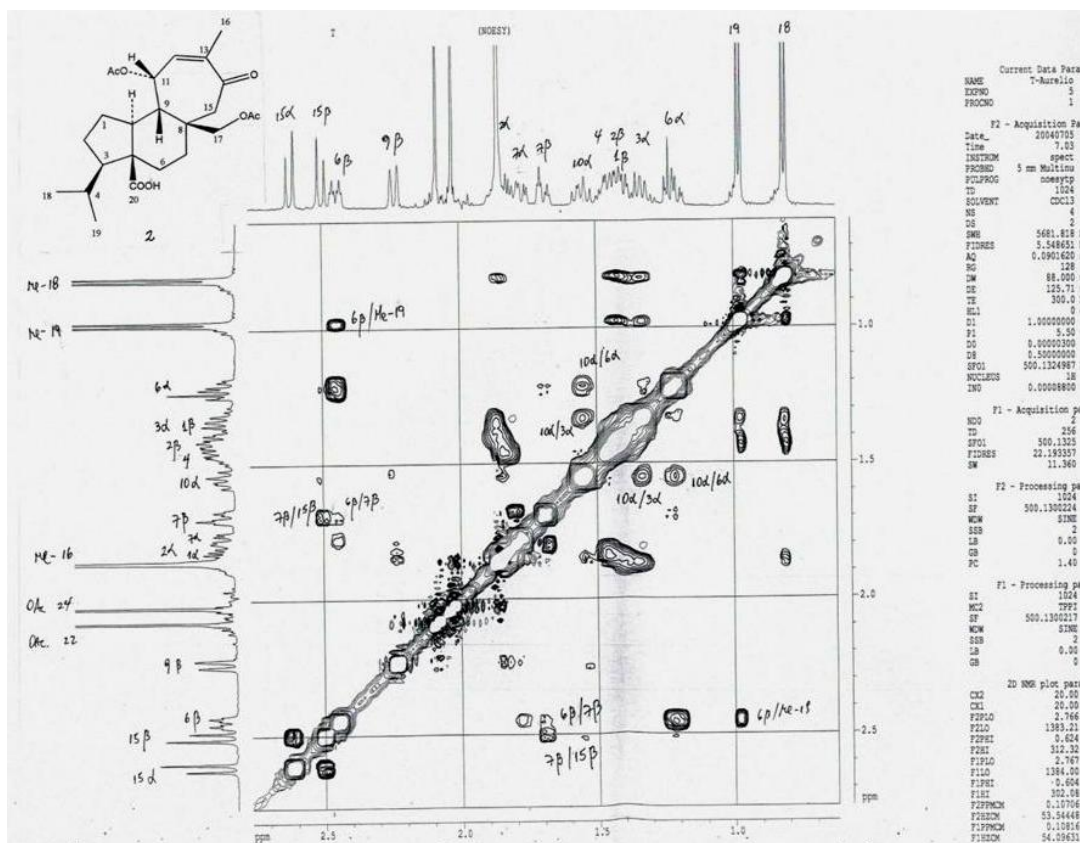

Figure S14. NOESY spectra of compound 2(Cont.).

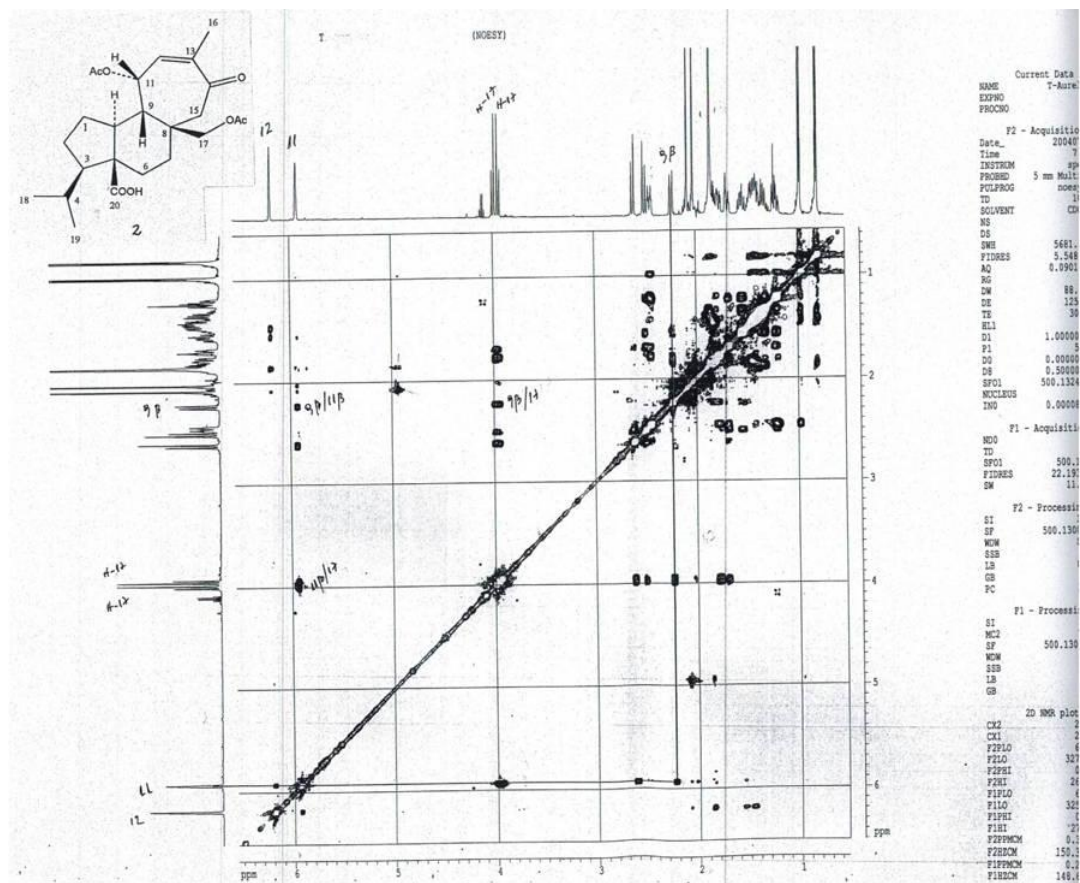





Figure S17.  $^1\text{H}$  NMR spectra (400.13 MHz) of compound 3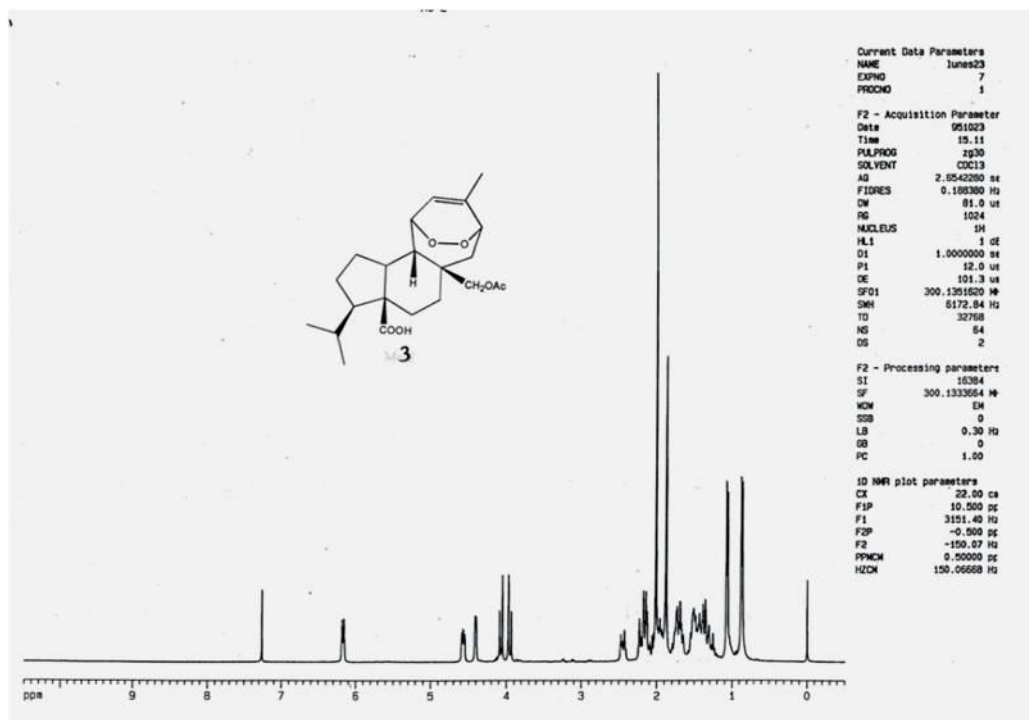

Supplement: molecules-19-03898-s001.pdf [file molecules-19-03898-s001.pdf]
